# Supplementary material for: Gemfibrozil Induces Anemia, Leukopenia and Reduces Hematopoietic Stem Cells via PPAR-α in Mice
Source: MDPI journal article supplement (doi:10.3390/ijms21145050), 2020-07-17
Supplement: s1 [file s1]

## Supplementary figure S1

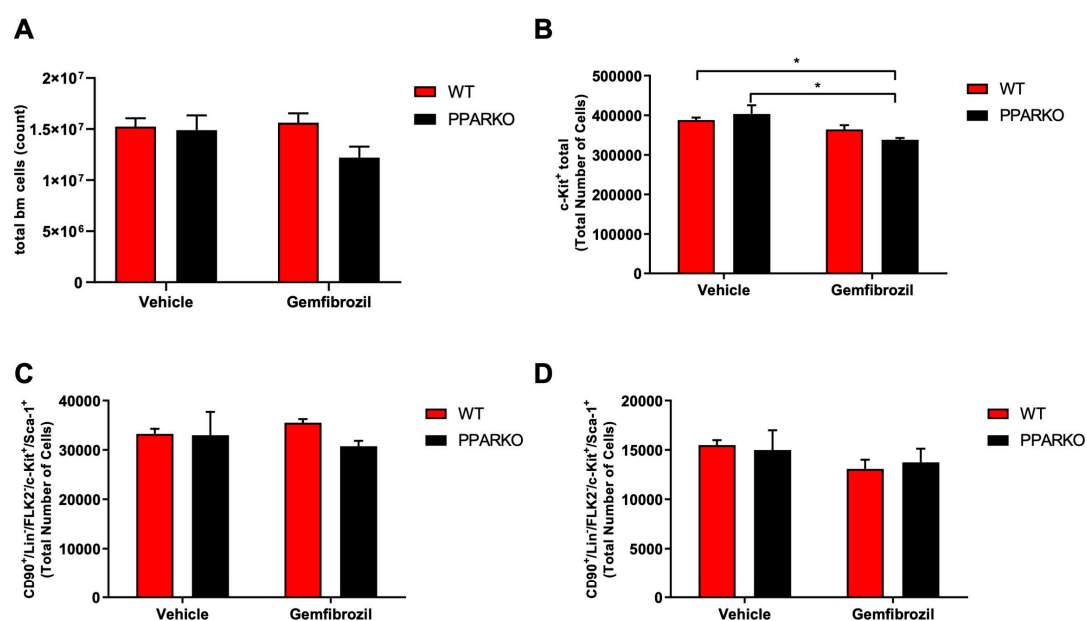

**Supplementary Figure S1 | Total bone marrow cells count and total flow cytometry markers count.**

The panels show the total number of bone marrow cells (A), total number of c-Kit<sup>+</sup> (B), total number of progenitors (CD90<sup>+</sup>Lin<sup>-</sup>c-Kit<sup>+</sup>Sca-1<sup>+</sup>) (C) and total number of HSCs (D). Data presented as Mean ± SEM; n = 5-6 per group. Two-way ANOVA followed by Tukey's post-hoc test. \* p < 0.05.
